# Supplementary material
Source: PubMed Central journal article supplement (PMC4754196)
Supplement: supp_150535_150535-1-at.pdf [file supp_150535_150535-1-at.pdf]

## Appendix 1 (as supplied by the authors): Search strategy and flow chart

### Search strategy

#### Pubmed

| Search | Query                | Results   |
|--------|----------------------|-----------|
| #1     | death                | 619,,465  |
| #2     | mortality            | 897,484   |
| #3     | heart rate           | 279,341   |
| #4     | pulse rate           | 299,082   |
| #5     | prospective          | 664,539   |
| #6     | cohort               | 354,084   |
| #7     | longitudinal         | 194,680   |
| #8     | follow up            | 958,259   |
| #9     | follow-up            | 953,480   |
| #10    | #1 OR #2             | 1,343,452 |
| #11    | #3 OR #4             | 299,082   |
| #12    | #5 OR #6 OR #7 OR #8 | 1,704,723 |
| #13    | #10 AND #11 AND #12  | 23,136    |

Embase and Medline

| Search | Query                | Results   |
|--------|----------------------|-----------|
| #1     | death                | 896,156   |
| #2     | mortality            | 1,021,843 |
| #3     | heart rate           | 242,844   |
| #4     | pulse rate           | 49,794    |
| #5     | prospective          | 637,775   |
| #6     | cohort               | 494,978   |
| #7     | longitudinal         | 227,832   |
| #8     | follow up            | 1,291,247 |
| #9     | follow-up            | 1,291,247 |
| #10    | #1 OR #2             | 1,698,565 |
| #11    | #3 OR #4             | 287,491   |
| #12    | #5 OR #6 OR #7 OR #8 | 2,220,126 |
| #13    | #10 AND #11 AND #12  | 6,987     |

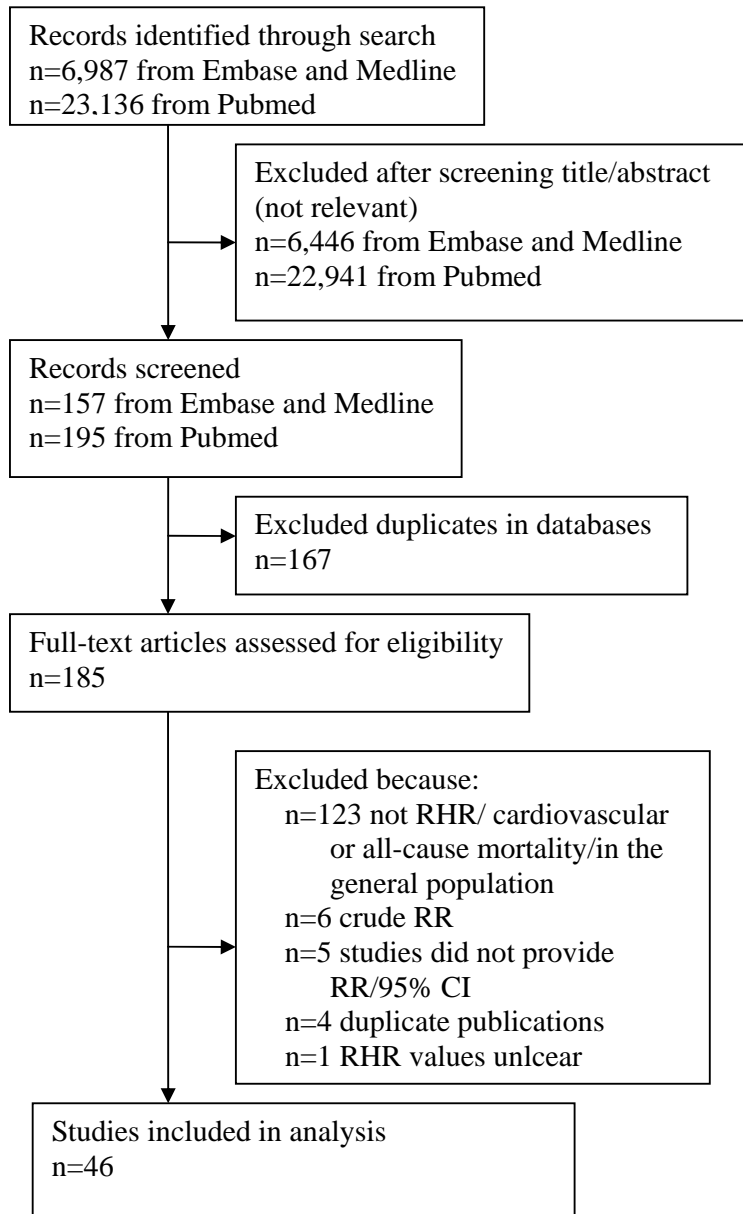

The flow chart for detailed steps of literature search

There are 6 studies only providing crude RR<sup>1-6</sup>, 5 studies did not provide RR/95% CI<sup>7-11</sup>, 4 duplicate publications<sup>12-15</sup> and 1 study with unclear RHR values<sup>16</sup>.

## References

1. Dyer AR, Persky V, Stamler J, Paul O, Shekelle RB, Berkson DM, et al. Heart rate as a prognostic factor for coronary heart disease and mortality: findings in three Chicago epidemiologic studies. *Am J Epidemiol* 1980;112:736-749.
2. Wannamethee G, Shaper AG, Macfarlane PW. Heart rate, physical activity, and mortality from cancer and other noncardiovascular diseases. *Am J Epidemiol* 1993;137:735-748.
3. Fujiura Y, Adachi H, Tsuruta M, Jacobs DR, Jr., Hirai Y, Imaizumi T. Heart rate and mortality in a Japanese general population: an 18-year follow-up study. *J Clin Epidemiol* 2001;54:495-500.
4. Perk G, Stessman J, Ginsberg G, Bursztyn M. Sex differences in the effect of heart rate on mortality in the elderly. *J Am Geriatr Soc* 2003;51:1260-1264.
5. Gulati M, Shaw LJ, Thisted RA, Black HR, Bairey Merz CN, Arnsdorf MF. Heart rate response to exercise stress testing in asymptomatic women: the st. James women take heart project. *Circulation* 2010;122:130-137.
6. Rozanski A, Gransar H, Min JK, Hayes SW, Friedman JD, Thomson LE, et al. Long-term mortality following normal exercise myocardial perfusion SPECT according to coronary disease risk factors. *J Nucl Cardiol* 2014;21:341-350.
7. Kannel WB, Kannel C, Paffenbarger RS, Jr., Cupples LA. Heart rate and cardiovascular mortality: the Framingham Study. *Am Heart J* 1987;113:1489-1494.
8. Gillum RF. The epidemiology of resting heart rate in a national sample of men and women: associations with hypertension, coronary heart disease, blood pressure, and other cardiovascular risk factors. *Am Heart J* 1988;116:163-174.
9. Menotti A, Mulder I, Nissinen A, Feskens E, Giampaoli S, Tervahauta M, et al. Cardiovascular risk factors and 10-year all-cause mortality in elderly European male populations; the FINE study. Finland, Italy, Netherlands, Elderly. *Eur Heart J* 2001;22:573-579.
10. Pitsavos C, Panagiotakos DB, Menotti A, Chrysohoou C, Skoumas J, Stefanadis C, et al. Forty-year follow-up of coronary heart disease mortality and its predictors: the Corfu cohort of the seven countries study. *Prev Cardiol* 2003;6:155-160.
11. Menotti A, Lanti M, Maiani G, Kromhout D. Determinants of longevity and all-cause mortality among middle-aged men. Role of 48 personal characteristics in a 40-year follow-up of Italian Rural Areas in the Seven Countries Study. *Aging Clin Exp Res* 2006;18:394-406.
12. Hartaigh BO, Allore HG, Trentalange M, McAvay G, Pilz S, Dodson JA, et al. Elevations in time-varying resting heart rate predict subsequent all-cause mortality in older adults. *Eur J Prev Cardiol* 2014.
13. Jensen MT, Marott JL, Allin KH, Nordestgaard BG, Jensen GB. Resting heart rate is associated with cardiovascular and all-cause mortality after adjusting for inflammatory markers: the Copenhagen City Heart Study. *Eur J Prev Cardiol* 2012;19:102-108.
14. Jouven X, Empana JP, Schwartz PJ, Desnos M, Courbon D, Ducimetiere P.

Heart-rate profile during exercise as a predictor of sudden death. *N Engl J Med* 2005;352:1951-1958.

15. Chen J, Chen SH, Liu X, Zhang CF, Yao T, Yang H, et al. [Relationship between baseline heart rate and all-cause death in general population]. *Zhonghua Liu Xing Bing Xue Za Zhi* 2013;34:622-625.
16. Menotti A, Kromhout D, Nissinen A, Giampaoli S, Seccareccia F, Feskens E, et al. Short-term all-cause mortality and its determinants in elderly male populations in Finland, The Netherlands, and Italy: the FINE Study. Finland, Italy, Netherlands Elderly Study. *Prev Med* 1996;25:319-326.
