# Supplementary material
Source: PubMed Central journal article supplement (PMC4754196)
Supplement: supp_150535_150535-3-at.pdf [file supp_150535_150535-3-at.pdf]

### Appendix 3 (as supplied by the authors): Meta-regression results on Adj R<sup>2</sup>

| Factor                                     | All-cause mortality |               |                  | Cardiovascular mortality |               |                  |
|--------------------------------------------|---------------------|---------------|------------------|--------------------------|---------------|------------------|
|                                            | 60-80 bpm           | >80 bpm       | 10 bpm increment | 60-80 bpm                | >80 bpm       | 10 bpm increment |
| Follow-up duration                         | -0.85%              | 25.77%        | 6.08%            | -12.61%                  | 7.07%         | 9.51%            |
| Sample size                                | 13.54%              | -5.00%        | -3.69%           | 12.81%                   | -8.32%        | 0.59%            |
| Mean age                                   | 1.98%               | -5.50%        | 11.07%           | -18.08%                  | 4.03%         | -4.89%           |
| Country                                    | -2.61%              | -3.17%        | 15.42%           | -14.44%                  | -5.28%        | 16.45%           |
| Excluding CVD at baseline                  | 3.72%               | 8.91%         | -2.58%           | -8.19%                   | 1.69%         | 4.19%            |
| Sex                                        | -8.21%              | -5.36%        | 5.21%            | -8.12%                   | -8.08%        | -3.89%           |
| RHR assessment                             | -9.09%              | -3.53%        | 23.13%           | -18.91%                  | -9.12%        | 12.78%           |
| Resting period                             | -8.25%              | 9.98%         | -3.78%           | 18.62%                   | 9.36%         | -5.16%           |
| Posture                                    | 4.35%               | 7.62%         | -4.61%           | -6.00%                   | -0.60%        | -5.60%           |
| Adjust for blood pressure                  | <b>22.58%</b>       | <b>14.01%</b> | -3.78%           | <b>84.16%</b>            | -0.77%        | -5.53%           |
| Adjust for smoking                         | ---                 | -0.93%        | -4.25%           | <b>55.80%</b>            | <b>61.05%</b> | -5.18%           |
| Adjust for body mass index                 | -8.69%              | -4.28%        | 0.49%            | -19.71%                  | -8.96%        | -5.71%           |
| Adjust for physical activity               | -7.35%              | -0.60%        | 0.86%            | 4.01%                    | <b>21.71%</b> | <b>24.41%</b>    |
| Adjust for serum cholesterol/triglycerides | 0.76%               | -0.94%        | -4.11%           | -10.65%                  | -5.62%        | ---              |
| Adjust for diabetes/blood glucose          | 35.82%              | 9.26%         | -2.86%           | 6.50%                    | 1.80%         | -4.14%           |
| Adjust for alcohol                         | -6.95%              | -5.34%        | -3.47%           | -17.18%                  | -6.00%        | -5.56%           |
| Adjust for education/social class          | 4.07%               | 2.98%         | -0.49%           | -15.76%                  | 0.64%         | 5.83%            |
| Number of covariates adjusted              | -7.57%              | -4.15%        | 3.92%            | -21.97%                  | -5.98%        | 6.13%            |
| Study quality                              | <b>31.12%</b>       | <b>24.85%</b> | -0.63%           | <b>29.43%</b>            | <b>24.53%</b> | 5.54%            |
| All factors                                | <b>100.00%</b>      | <b>61.92%</b> | <b>37.60%</b>    | <b>100.00%</b>           | <b>89.21%</b> | <b>44.89%</b>    |

“---”: all of the studies adjusted for smoking and serum cholesterol/triglycerides, respectively.

Adj R<sup>2</sup> = [REML estimate of between-study variance (tau<sup>2</sup>) did not accounting for the factor - REML estimate of between-study variance (tau<sup>2</sup>) accounting for the factor]/[REML estimate

of between-study variance ( $\tau^2$ ) did not accounting for the factor]\*100%. REML: restricted maximum likelihood.

When the between-study variance explained ( $\text{Adj } R^2$ ) by one factor is less than the between-study variance caused by chance, the corresponding value of  $\text{Adj } R^2$  will be negative (less than 0). The results were obtained with the Stata module “metareg”.
