# Supplementary material
Source: PubMed Central journal article supplement (PMC4754196)
Supplement: supp_150535_150535-4-at.pdf [file supp_150535_150535-4-at.pdf]

**Appendix 4 (as supplied by the authors): Dose-response analysis with 70 bpm of RHR as the reference**

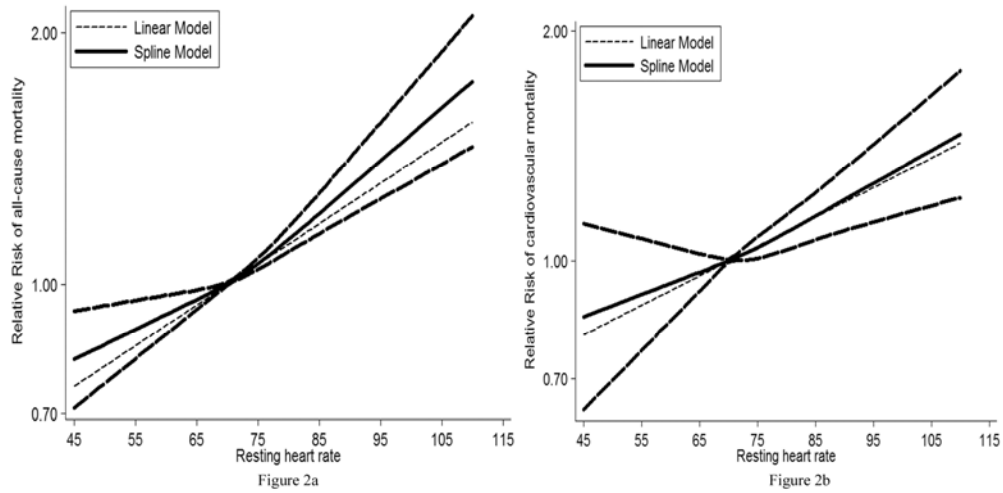

The dose-response analysis of resting heart rate with risk of all-cause mortality (Figure 2a) and cardiovascular mortality (Figure 2b) with 70 bpm as the reference level). The solid line and the long dash line represent the estimated relative risk and its 95% confidence interval. Short dash line represents the linear relationship.
